# Supplementary material for: Comparative Effectiveness of the Core Components of Cardiac Rehabilitation on Mortality and Morbidity: A Systematic Review and Network Meta-Analysis
Source: PubMed Central journal article supplement (PMC6306907; doi:10.3390/jcm7120514), 2018-12-04
Supplement: jcm-07-00514-s001.pdf [file jcm-07-00514-s001.pdf]

## Supplemental File 1— Search Strategy in Ovid MEDLINE

1. exp myocardial ischemia/ or exp coronary artery bypass/ or ((myocard\$ adj5 (ischaemia? or ischemia?)) or (isch?emi\$ adj5 heart) or (myocard\$ adj5 infarct\$) or (heart adj5 infarct\$) or angina or (coronary adj5 (disease\$ or bypass or thrombo\$ or angioplast\$))).ti,ab.
2. exp exercise therapy/ or sports/ or physical exertion/ or exp exercise/ or rehabilitation/ or early ambulation/ or "physical education and training"/ or (rehabilitat\$ or (physical\$ adj5 (fit\$ or train\$ or therap\$ or activit\$)) or (train\$ adj5 (strength\$ or aerobic\$ or exercise\$)) or ((exercise\$ or fitness) adj3 (treatment or intervent\$ or program\$)) or "cardiac rehabilitation" or kinesiotherap\$).ti,ab.
3. patient education as topic/ or health education/ or psychotherapy, group/ or health promotion/ or telemedicine/ or counseling/ or self care/ or behavior therapy/ed, mt or health knowledge, attitudes, practice/ or preventive health services/ or secondary prevention/ or risk reduction behavior/ or inpatients/ed or outpatients/ed or consumer participation/ or audiovisual aids/ or "continuity of patient care"/ or ((rehabilitat\$ adj5 (service\$ or group\$ or program\$ or session\$ or educat\$)) or (behavio?r\$ adj5 intervention\$) or (health adj2 education) or (lifestyle\$ adj5 (intervention\$ or education\$)) or "patient information" or "patient education" or "education\$ intervention\$" or (behavio?r\$ adj5 educat\$) or (educat\$ adj5 rehabilitation) or ((program\$ or rehabilitation or instruction\$ or teach\$ or learn\$ or educat\$) and (literature or audiovisual or "av" or internet or website\$ or telecare or telemedicine or telephone or phone or teleconference or telehealth or transtelephonic\$ or podcast\$)) or ("public health" adj (intervention\$ or program\$ or scheme\$)) or "education\$ program\$" or psychoeducation\$ or educat\$ or (program\$ and (risk adj1 reduc\$)) or (patient\$ adj3 (instruct\$ or teach\$ or taught or learn\$ or knowledge)) or "community based intervention\$").ti,ab.
4. exp psychotherapy/ or exp relaxation therapy/ or exp meditation/ or exp counseling/ or stress, psychological/ or psychopathology/ or autogenic training/ or (psychotherapy\$3 or (psycholog\$5 adj intervent\$5) or relax\$6 or (counselling or counseling) or ((behavior\$4 or behavior\$4) adj4 (modify or modificat\$4 or therap\$2 or change)) or (stress adj4 management) or (cognitive adj4 therap\$2) or meditate\$4 or anxiety or (manage\$5 adj2 (anxiety or depress\$5)) or cbt or hypnotherapy\$5 or (goal\$2 adj3 setting) or (psycho-educat\$5 or psychoeducat\$5) or (motivate\$5 adj3 (intervention or interv\$3)) or psychopathol\$4 or psychosocial\$4 or distress\$4 or (heart adj manual) or autogenic\$5).ti,ab.
5. exp smoking cessation/ or "tobacco-use-cessation"/ or "tobacco-use-disorder"/ or tobacco-smokeless/ or exp tobacco-smoke-pollution/ or exp tobacco/ or exp nicotine/ or exp smoking/pc, th or (smoking cessation or ((quit\$ or stop\$ or ceas\$ or giv\$) adj5 smoking)).ti,ab.
6. 2 or 3 or 4 or 5
7. (randomized controlled trial or controlled clinical trial).pt. or (randomized or placebo or randomly).ab. or clinical trials as topic.sh. or trial.ti.
8. (animals not humans).sh.
9. (1 and 6 and 7) not 8

**Supplemental File 2—Characteristics of Included Trials, N = 148**

| Study First Author, Year  | Country     | N Randomized | Patient Indication    | Mean Age (Years) | Sex (% Male) | Control Components | Intervention Components† | Outcomes                                         | Follow-Up (Months) |
|---------------------------|-------------|--------------|-----------------------|------------------|--------------|--------------------|--------------------------|--------------------------------------------------|--------------------|
| Albus, 2009 [24]          | Germany     | 77           | CAD                   | 54.2             | 87.0%        | RFM, PE            | RFM, NC, PM, PE, ET      | TM, CVM, TMI, FMI                                | 36                 |
| Albus, 2014 [25]          | Germany     | 570          | CAD                   | 59.0             | NR           | RFM                | RFM, PM                  | TM                                               | 18                 |
| Aldana, 2007 [26]         | USA         | 93           | CAD                   | 61.5             | 57.0%        | RFM, PE, ET        | NC, PM, PE, ET           | TM                                               | 12                 |
| Allison, 2000 [27]        | USA         | 326          | Angina                | 58.0             | 56.4%        | UC                 | RFM                      | TM, CVM, TMI, NFMI, REV, CABG, PCI, HOSP, CVHOSP | 6                  |
| Andersson, 2010 [28]      | Sweden      | 149          | MI, CABG, PCI         | 53.4             | NR           | ET                 | NC, PM, PE, ET           | HOSP                                             | 60                 |
| Appels, 2005 [29]         | Netherlands | 710          | PCI                   | 54.7             | 77.5%        | UC                 | PM                       | TMI, REV, CABG, PCI                              | 18                 |
| Asbury, 2011 [30]         | UK          | 49           | Cardiac Syndrome X    | 61.7             | NR           | UC                 | PM                       | TM                                               | 12                 |
| Bambauer, 2005 [31]       | USA         | 100          | MI, Angina            | 60.3             | 53.0%        | UC                 | PM                       | TM                                               | 6                  |
| Barnason, 2009 [32]       | USA         | 232          | CABG                  | 71.2             | 83.6%        | UC                 | PM, ET                   | TM, HOSP                                         | 6                  |
| Beckie, 2010 [33]         | USA         | 225          | MI, CABG, PCI, Angina | 63.5             | NR           | RFM, ET            | RFM, PM, PE, ET          | TM                                               | 6                  |
| Belardinelli_B, 2001 [34] | Italy       | 130          | PCI                   | 57.0             | NR           | UC                 | ET                       | CVM, TMI, NFMI, REV, CABG, PCI                   | 6                  |
| Belardinelli, 2001 [35]   | Italy       | 118          | PCI                   | 56.0             | 76.2%        | UC                 | ET                       | HOSP                                             | 12                 |
| Bengtsson, 1983 [36]      | Sweden      | 171          | MI                    | 56.2             | 43.3%        | UC                 | PE, ET                   | TM, TMI                                          | 12                 |
| Beresnevaite, 2000 [37]   | Lithuania   | 36           | MI                    | 50.1             | 97.2%        | PE                 | PM                       | TM, CVM, TMI, FMI, NFMI, HOSP, CVHOSP            | 24                 |

|                          |             |      |                            |      |        |                 |                     |                              |     |
|--------------------------|-------------|------|----------------------------|------|--------|-----------------|---------------------|------------------------------|-----|
| Berkman; 2003 [38]       | USA         | 2481 | MI                         | 61   | 56,3%  | UC              | PM, PE              | TM, CVM, NFMI, REV, CVHOSP   | 24  |
| Bertie, 1992 [39]        | UK          | 110  | MI                         | 52.4 | NR     | PE              | NC, PE, ET          | TM, TMI, REV, CABG           | 24  |
| Bethell, 1999 [40]       | UK          | 200  | MI                         | 53.7 | 100%   | UC              | ET                  | TM                           | 132 |
| Black, 1998 [41]         | USA         | 380  | MI, CABG, PCI, Angina, CAD | 60.2 | 13.9%  | NC, RFM, PE, ET | NC, RFM, PM, PE, ET | HOSP, CVHOSP                 | 21  |
| Blasco, 2012 [42]        | Spain       | 203  | MI, Angina                 | 60.8 | 80.3%  | PE              | RFM, PE             | TM                           | 12  |
| Blumenthal, 1997 [43]    | USA         | 77   | CAD                        | 60.5 | 157.1% | PM, PE          | ET                  | TM, NFMI, REV, CABG, PCI     | 10  |
| Blumenthal, 2016 [44]    | USA         | 151  | CAD                        | 61.1 | 94.7%  | NC, PE, ET      | NC, PM, PE, ET      | TM, TMI, REV                 | 63  |
| Broadbent, 2009 [45]     | New Zealand | 103  | MI                         | 54.7 | 88.3%  | UC              | PM                  | TM,                          | 6   |
| Burgess, 1987 [46]       | USA         | 180  | MI                         | 50.9 | 85.6%  | UC              | PM                  | TM                           | 13  |
| Burr, 2005 [47]          | UK          | 3114 | Angina                     | 61.1 | 23.7%  | UC              | NC                  | TM, CVM                      | 6   |
| Burrell, 1995 [48]       | Sweden      | 261  | CABG                       | NR   | NR     | UC              | PM                  | TM                           | 78  |
| Byrkjeland, 2015 [49]    | Norway      | 137  | CAD                        | 63.9 | 83.9%  | UC              | ET                  | TM, CVM, HOSP, CVHOSP        | 12  |
| Carson, 1982 [50]        | UK          | 303  | MI                         | 51.5 | 100%   | UC              | ET                  | TM, CVM, TMI, FMI, NFMI      | 24  |
| Chow, 2015 [51]          | Australia   | 710  | MI, CAD                    | 57.6 | 82.0%  | UC              | PE                  | TM                           | 6   |
| Claesson, 2005 [52]      | Sweden      | 198  | MI, CABG, PCI, Angina, CAD | 60.5 | NR     | UC              | PM, PE              | TMI, NFMI, REV, HOSP, CVHOSP | 12  |
| Clark, 2000 [53]         | USA         | 571  | CAD                        | 71.9 | NR     | UC              | PE                  | TM                           | 12  |
| Cohen, 2014 [54]         | France      | 504  | MI, Angina                 | 56.8 | 83.9%  | UC              | NC, RFM, PE         | TM, CVM, REV, PCI            | 12  |
| Costa e Silva, 2008 [55] | Brazil      | 153  | MI                         | 58.3 | 63.4%  | UC              | NC, RFM, PE         | TM, REV, CABG, PCI, HOSP     | 6   |

|                          |         |      |                 |       |        |            |                     |                               |    |
|--------------------------|---------|------|-----------------|-------|--------|------------|---------------------|-------------------------------|----|
| Cupples, 1999 [56]       | Ireland | 688  | Angina          | 63.0  | 59.3%  | UC         | RFM, PE             | TM                            | 60 |
| Dalal, 2007 [57]         | UK      | 104  | MI              | 62.4  | 80.8%  | PM, PE, ET | NC, RFM, PM, PE, ET | TM, VER, CABG                 | 9  |
| Davidson, 2007 [58]      | Canada  | 26   | MI, Angina      | NR    | 100%   | PE         | PM                  | HOSP                          | 8  |
| Davidson, 2010 [59]      | USA     | 157  | MI, Angina      | 60.2  | 46.5%  | UC         | PM                  | HOSP, CVHOSP                  | 6  |
| De Lorgeril, 1999 [60]   | France  | 423  | MI              | NR    | NR     | UC         | NC                  | TM, CVM, TMI, NFMI, REV       | 46 |
| DeBusk, 1994 [61]        | USA     | 585  | MI              | 57.0  | 78.8%  | NC, RFM    | NC, RFM, PE, ET     | TM, CVM, TMI, CABG, PCI       | 12 |
| Donohue, 2014 [62]       | USA     | 189  | CABG            | 67.0  | 61.4%  | UC         | PM                  | TM                            | 12 |
| Du, 2016 [63]            | China   | 979  | MI, Angina, PCI | 60.9  | 71.5%  | PE         | RFM, PE             | TM, CVM, TMI, NFMI            | 36 |
| Dugmore, 1999 [64]       | UK      | 124  | MI              | 52.2  | 98.4%  | UC         | ET                  | TM, NFMI                      | 12 |
| Edworthy, 2007 [65]      | Canada  | 2643 | CAD             | 63.9  | 72.2%  | UC         | RFM, PE             | TM, HOSP                      | 19 |
| Engblom B, 1992 [66]     | Finland | 205  | CABG            | 54.0  | 119.9% | PE         | NC, PM, PE, ET      | TM, CVM                       | 12 |
| Erdman, 1983 [67]        | USA     | 80   | MI              | 51.0  | NR     | UC         | NC, RFM, PM, ET     | TM, TMI, NFMI, REV, CABG, PCI | 6  |
| Fihn, 2011 [68]          | USA     | 703  | CAD             | 67.7  | 97.7%  | UC         | RFM, PE             | TM                            | 12 |
| Frasure-Smith, 1985 [69] | Canada  | 453  | MI              | 58.2  | 100%   | UC         | PM                  | TM, CVM, HOSP, CVHOSP         | 12 |
| Frasure-Smith, 1987 [70] | Canada  | 1376 | MI              | 59.3  | 65.6%  | UC         | PM, PE              | TM, CVM, TMI, NFMI, REV       | 12 |
| Fridlund, 1992 [71]      | Sweden  | 150  | MI              | 56.3  | 67.3%  | UC         | PM, PE, ET          | TM, TMI, HOSP                 | 12 |
| Friedman, 1984 [72]      | USA     | 300  | MI              | 53.25 | NR     | PE         | PM, PE              | TM, CVM, NFMI                 | 66 |

|                       |            |     |                |      |        |        |                     |                              |    |
|-----------------------|------------|-----|----------------|------|--------|--------|---------------------|------------------------------|----|
| Froelicher, 1984 [73] | USA        | 146 | CAD            | 53.0 | 100%   | UC     | ET                  | TM, TMI, REV, CABG           | 12 |
| Furber, 2010 [74]     | Australia  | 222 | CAD            | 66.0 | 68.0%  | PE     | PE, ET              | TM                           | 10 |
| Furze, 2012 [75]      | USA        | 142 | Angina         | 64.4 | 52.8%  | RFM    | RFM, PM, PE         | TM, CVM, REV, HOSP, CVHOSP   | 6  |
| Ghroubi, 2012 [76]    | Tunisia    | 68  | PCI, MI        | NR   | NR     | UC     | NC, RFM, PM, PE, ET | HOSP                         | 24 |
| Giallauria, 2008 [77] | Italy      | 61  | MI             | 55.5 | 72.1%  | UC     | ET                  | TMI, NFMI, REV, HOSP, CVHOSP | 6  |
| Giannuzzi, 1993 [78]  | Italy      | 95  | MI             | 50.5 | NR     | PM, PE | ET                  | TM, REV, CABG                | 6  |
| Giannuzzi, 1997 [79]  | Italy      | 80  | MI             | 53.5 | 95.0%  | UC     | ET                  | TM, CVM, REV, HOSP, CVHOSP   | 6  |
| Gortner, 1988 [80]    | USA        | 67  | CABG           | 61.5 | 80.6%  | PE     | RFM, NC, PM, PE, ET | TM                           | 6  |
| Gulliksson, 2011 [81] | Sweden     | 362 | MI, PCI, CABG  | 61.5 | 76.5%  | UC     | PM                  | TM, TMI, FMI, NFMI           | 96 |
| Gutschker, 1977 [82]  | Germany    | 70  | MI             | NR   | 100%   | UC     | ET                  | TM                           | 24 |
| Hamalaine, 1991 [83]  | Finland    | 456 | MI             | 55.8 | 77.0%  | PE     | NC, RFM, PE, ET     | TM, CVM, TMI, FMI            | 72 |
| Hambrecht, 1993 [84]  | Germany    | 62  | Angina         | 53.5 | 141.9% | UC     | NC, ET              | TM                           | 12 |
| Hanssen, 2007 [85]    | Norway     | 288 | MI             | 60.2 | 80.9%  | UC     | PE                  | TM                           | 6  |
| Harald, 2015 [86]     | Netherland | 754 | ACS            | NR   | NR     | UC     | RFM, PE             | CVHOSP                       | 12 |
| Haskell, 1994 [87]    | USA        | 300 | PCI, CABG, CAD | 57.2 | 72.0%  | UC     | NC, RFM, PE, ET     | TM, REV                      | 48 |
| Hawkes, 2013 [88]     | Australia  | 430 | MI             | 60.6 | 74.7%  | PE     | RFM, PM, PE         | TM                           | 6  |
| Heller, 1993 [89]     | Australia  | 450 | MI             | 58.5 | 71.8%  | UC     | NC, RFM, PE, ET     | TM                           | 6  |
| Higgins, 2001 [90]    | Australia  | 99  | PCI            | NR   | 94.9%  | PE     | RFM, PM, PE, ET     | TM                           | 12 |

|                           |             |      |               |       |       |             |                     |                               |     |
|---------------------------|-------------|------|---------------|-------|-------|-------------|---------------------|-------------------------------|-----|
| Hoffman-Bang, 1999 [91]   | Sweden      | 93   | PCI           | 53.0  | 78.5% | UC          | NC, PM, PE, ET      | HOSP                          | 12  |
| Jolly, 2007 [92]          | UK          | 525  | MI, CABG, PCI | 61.05 | 76.6% | PE, ET      | PM, PE, ET          | TM                            | 12  |
| Jones, 1996 [93]          | UK          | 2328 | MI            | NR    | NR    | UC          | PM                  | TM, TMI, REV, PCI, HOSP       | 12  |
| Kallio, 1979 [94]         | Finland     | 375  | MI            | 54.2  | 80.3% | UC          | NC, RFM, PM, PE, ET | TM, CVM, NFMI                 | 36  |
| Karlsson, 2007 [95]       | Sweden      | 224  | MI, CABG      | 63.5  | 76.8% | RFM, PE, ET | NC, RFM, PM, PE, ET | TM                            | 12  |
| Koertge, 2008 [96]        | Sweden      | 247  | MI, PCI, CABG | 62.0  | NR    | UC          | PM                  | TM                            | 24  |
| Kure, 2014 [97]           | Australia   | 602  | CAD           | 69.6  | 70.3% | UC          | PM                  | TM                            | 30  |
| La Rovere, 2002 [98]      | Italy       | 95   | MI            | 51.5  | 100%  | UC          | RFM, PE, ET         | TM, TMI, NFMI, REV, CABG      | 120 |
| Leemrijse, 2016 [99]      | Netherlands | 374  | MI, Angina    | 60.5  | 81.0% | UC          | RFM, PE             | TM                            | 6   |
| Lehmann, 2011 [100]       | Germany     | 105  | CAD           | 59.3  | 70.5% | PE          | NC, PM              | TM, CVM, TMI, REV, CABG, PCI  | 36  |
| Leizorovicz, 1991 [101] † | France      | 182  | MI            | 50.0  | NR    | UC          | NC, RFM, PM, ET     | TM, TMI, CABG                 | 24  |
| Lewin, 1992 [102]         | UK          | 176  | MI            | 55.8  | 71.6% | UC          | PE, PE, ET          | HOSP                          | 12  |
| Lewin, 2002 [103]         | UK          | 142  | Angina        | 67.2  | 59.9% | PE          | PM, PE              | TM                            | 12  |
| Lidell, 1996 [104]        | Sweden      | 116  | MI            | 56.3  | 87.1% | RFM         | NC, RFM, PM, PE, ET | TM, TMI, REV, CABG, PCI, HOSP | 12  |
| Lie, 2007 [105]           | Norway      | 203  | CAD           | 62.0  | 81.8% | PE          | PM, PE              | HOSP                          | 6   |
| Lin, 2017 [106]           | Iran        | 288  | CABG          | 75.5  | 66.3% | UC          | PE                  | TM                            | 18  |
| Manchanda, 2000 [107]     | India       | 42   | CAD           | 51.5  | 100%  | RFM         | NC, PM, ET          | REV, CABG, PCI                | 12  |
| Marcus, 1999 [108]        | Romania     | 129  | MI            | 52.5  | 100%  | UC          | RFM, ET             | TM, TMI, REV, CABG, PCI       | 300 |

|                            |              |      |               |      |       |        |                |                                         |     |
|----------------------------|--------------|------|---------------|------|-------|--------|----------------|-----------------------------------------|-----|
| Maroto-Montero, 2005 [109] | Spain        | 180  | MI            | 51.4 | 100%  | PE     | PM, PE, ET     | TM, CVM, TMI, FMI, REV, PCI             | 120 |
| Marra, 1985 [110]          | NR           | 167  | MI            | 49.9 | NR    | PE     | ET             | TM, CVM, TMI, REV, CABG                 | 54  |
| Mayou, 2002 [111]          | UK           | 114  | MI            | 58.1 | 78.1% | UC     | PM, PE         | TM                                      | 12  |
| Meisinger, 2013 [112]      | Germany      | 340  | MI            | 75.4 | 60.0% | UC     | RFM, PE        | TM, HOSP                                | 12  |
| Michalsen, 2005 [113]      | Germany      | 101  | PCI, CAD      | 59.4 | 77.2% | PE     | NC, PM         | REV, CABG, PCI, HOSP, CVHOSP            | 12  |
| Miller, 1984 [114]         | USA          | 198  | MI            | 52.0 | NR    | UC     | ET             | TM, NFMI, REV                           | 6   |
| Mittag, 2006 [115]         | Germany      | 343  | MI, CABG, PCI | 59.8 | 81.9% | PE, ET | NC, PM, PE, ET | TM                                      | 12  |
| Mohiuddin, 2007 [116]      | USA          | 209  | MI, Angina    | 54.5 | 62.7% | UC     | RFM, PM        | TM, CVM, TMI, HOSP, CVHOSP              | 24  |
| Moholdt, 2012 [117]        | Norway       | 30   | CABG          | 62.6 | 80.0% | ET     | NC, PE, ET     | TM, CVM                                 | 7   |
| Molino-Lova, 2013 [118]    | Italy        | 140  | CAD, CABG     | 74.3 | 66.4% | UC     | ET             | TM, CVM                                 | 12  |
| Muniz, 2010 [119]          | Spain        | 1757 | MI, Angina    | 62.8 | 76.7% | UC     | PE             | TM                                      | 6   |
| Munk, 2009 [120]           | Norway       | 40   | PCI, Angina   | 59.0 | 82.5% | UC     | ET             | TMI, NFMI, REV, CABG, PCI, HOSP, CVHOSP | 6   |
| Murphy, 2009 [121]         | Ireland      | 903  | CAD           | NR   | NR    | UC     | RFM, PE        | HOSP                                    | 18  |
| Mutwalli, 2012 [122]       | Saudi Arabia | 49   | CABG          | 56.9 | 100%  | UC     | PE, ET         | TM, CVM, TMI, FMI, HOSP, CVHOSP         | 6   |

|                                    |             |     |                          |      |       |     |                        |                                                    |     |
|------------------------------------|-------------|-----|--------------------------|------|-------|-----|------------------------|----------------------------------------------------|-----|
| Myers, 2000 [123]                  | Switzerland | 25  | MI, CABG                 | 55.5 | 100%  | UC  | NC, PE, ET             | TM, CVM,<br>FMI, HOSP,<br>CVHOSP                   | 14  |
| Naughton, 2000 [124]               | USA         | 641 | MI                       | NR   | NR    | UC  | ET                     | TM                                                 | 36  |
| Neubeck, 2011 [125]                | NR          | 144 | MI, Angina               | 64.0 | 74.3% | UC  | RFM, PE                | TM                                                 | 48  |
| Oerkild, 2012 [126]                | Denmark     | 40  | MI, CABG, PCI            | 76.9 | 57.5% | RFM | NC, RFM, ET            | TM                                                 | 12  |
| Oldenburg, 1985 [127] <sup>†</sup> | Australia   | 46  | MI                       | 56.0 | 89.1% | UC  | PM, PE                 | TMI, REV,<br>HOSP,<br>CVHOSP                       | 12  |
| Oldridge, 1991 [128]               | Canada      | 201 | MI                       | 52.8 | 88.1% | UC  | PM, PE, ET             | TM                                                 | 12  |
| Oranta, 2010 [129]                 | Finland     | 103 | MI                       | 59.6 | 70.9% | UC  | PM                     | TM                                                 | 18  |
| Ornish, 1990 [130]                 | USA         | 48  | CAD                      | 57.9 | 75.0% | UC  | NC, PM, PE, ET         | TM                                                 | 12  |
| Orth-Gomer, 2009 [131]             | Sweden      | 239 | MI, CABG, PCI            | 61.5 | NR    | UC  | PM, PE                 | TM                                                 | 108 |
| Otterstad, 2003 [132]              | Norway      | 197 | MI, CABG,<br>PCI, Angina | 54.5 | 82.2% | UC  | RFM, NC, PM,<br>PE, ET | TM, HOSP                                           | 24  |
| Park, 2013 [133]                   | South Korea | 58  | PCI, Angina,<br>MI       | 58.1 | 82.8% | UC  | RFM, PE                | HOSP                                               | 6   |
| Raffo, 1980 [134]                  | UK          | 24  | Angina                   | 50.0 | 100%  | UC  | ET                     | TMI                                                | 6   |
| Rahe, 1975 [135]                   | USA         | 60  | MI                       | 49.8 | 88.3% | UC  | PM, PE                 | TM, TMI,<br>NFMI, REV,<br>CABG,<br>HOSP,<br>CVHOSP | 18  |
| Rakowska, 2015 [136]               | Poland      | 81  | MI                       | 53.5 | 60.5% | RFM | RFM, PM                | TM, CVM,<br>TMI, FMI,<br>NFMI,                     | 30  |
| Redfern, 2009 [137]                | Australia   | 208 | MI, Angina               | 64.5 | 51.4% | UC  | RFM, PE                | TM                                                 | 12  |
| Rollman, 2009 [138]                | USA         | 302 | CABG                     | 64.0 | 38.7% | UC  | PM                     | TM, HOSP                                           | 8   |



|                                       |             |      |                    |      |       |         |                        |                                                   |     |
|---------------------------------------|-------------|------|--------------------|------|-------|---------|------------------------|---------------------------------------------------|-----|
| Roman, 1983<br>[139]                  | Chile       | 193  | MI                 | 57.6 | 90.2% | UC      | ET                     | TM, CVM,<br>TMI, FMI,<br>REV, CABG                | 108 |
| Roncella, 2013<br>[140]               | Italy       | 101  | MI, PCI            | 55.0 | 78.2% | UC      | PM                     | TMI, REV                                          | 12  |
| Saffi, 2014 [141]                     | Brazil      | 80   | CAD                | 58.5 | 68.8% | UC      | NC, RFM, PE            | TM, TMI,<br>REV, CABG,<br>PCI                     | 12  |
| Salminen, 2005<br>[142]               | Finland     | 268  | CAD                | 73.9 | 40.3% | UC      | PE, ET                 | TM                                                | 16  |
| Santaularia, 2017<br>[143]            | Spain       | 86   | MI, Angina         | 59.5 | 83.7% | RFM     | RFM, PM, ET            | TM, HOSP,<br>CVHOSP                               | 12  |
| Schneider, 2012<br>[144]              | USA         | 201  | CAD                | 59.1 | 56.2% | PE      | PM                     | TM, CVM,<br>TMI, NFMI,<br>REV, HOSP,<br>CVHOSP    | 108 |
| Schuler, 1992<br>[145]                | Germany     | 113  | Angina             | 53.5 | 100%  | PE      | NC, RFM, PM,<br>PE, ET | TM, CVM,<br>TMI, NFMI,<br>REV, CABG,<br>PCI       | 12  |
| Sebregts, 2005<br>[146]               | Netherlands | 204  | MI, CABG           | 55.4 | 77.9% | RFM, ET | RFM, PM, PE,<br>ET     | TM, REV,<br>CABG, PCI,<br>HOSP,<br>CVHOSP         | 12  |
| Shaw, 1981 [147]                      | USA         | 651  | MI                 | 51.7 | 100%  | UC      | ET                     | TM, CVM,<br>TMI, FMI,<br>NFMI, REV,<br>CABG, HOSP | 36  |
| Singh, 1992 [148]                     | India       | 505  | MI, Angina         | 50.5 | 72.3% | NC      | NC, PE                 | TM, CVM,<br>TMI, FMI,<br>NFMI                     | 12  |
| Singh, 2002 [149]                     | India       | 1000 | MI, Angina,<br>CAD | 48.5 | 89.7% | NC      | NC, PE                 | TM, CVM,<br>TMI, FMI,<br>NFMI, REV                | 24  |
| Sivarajan, 1982<br>[150] <sup>+</sup> | USA         | 258  | MI                 | 56.3 | 79.8% | UC      | ET                     | TM, CVM,<br>REV                                   | 6   |

|                                |             |      |                            |      |       |        |                 |                                             |      |
|--------------------------------|-------------|------|----------------------------|------|-------|--------|-----------------|---------------------------------------------|------|
| Specchia, 1996 [151]           | Italy       | 256  | MI                         | 52.9 | 91.4% | UC     | ET              | TM, CVM, REV, CABG, PCI                     | 34.5 |
| Stahle, 1999 [152]             | Sweden      | 101  | MI, Angina                 | 71.0 | 80.2% | PE     | PM, ET          | REV, CABG, PCI, HOSP                        | 12   |
| Stern, 1983 [153]<br>†         | USA         | 106  | MI                         | 54.0 | 85.8% | UC     | ET              | TM, TMI, REV, CABG                          | 36   |
| Strandberg, 2006 [154]         | Finland     | 400  | MI, CAD                    | 80.0 | 34.8% | UC     | NC, RFM         | TM, CVM, TMI                                | 36   |
| Todd, 1991 [155]               | Scotland    | 40   | Angina                     | 52.0 | 100%  | UC     | ET              | TM, TMI, NFMI                               | 12   |
| Toobert, 2000 [156]            | USA         | 28   | MI, CABG, PCI, Angina, CAD | 63.5 | NR    | UC     | NC, PM, ET      | TM, CVM, TMI, FMI                           | 24   |
| Trzcieniecka-Green, 1996 [157] | UK          | 100  | MI, CABG                   | 60.2 | 87.0% | UC     | PM              | TMI, NFMI, REV, CABG                        | 6    |
| Turner, 2013 [158]             | Australia   | 57   | PCI, CABG, CAD             | 61.5 | 73.7% | PE     | PM              | TM                                          | 12   |
| Vahedian, 2016 [159]           | Iran        | 70   | MI                         | 61.4 | 65.7% | PE, ET | RFM, PM, PE, ET | TM                                          | 33   |
| Vale, 2003 [160]               | Australia   | 792  | CABG, PCI, MI, Angina      | 58.4 | 77.0% | UC     | NC, RFM, PE     | TM                                          | 6    |
| Van Dixhoorn, 1987 [161]       | Netherlands | 90   | MI                         | 55.1 | 93.3% | ET     | PM, ET          | TM, CVM, TMI, NFMI, REV, CABG, HOSP, CVHOSP | 24   |
| Vermeulen, 1983 [162]          | Netherlands | 98   | MI                         | 47.5 | 100%  | UC     | PM, ET          | TM, CVM, TMI, FMI, NFMI                     | 60   |
| Vona, 2009 [163]<br>†          | Switzerland | 611  | CAD                        | NR   | NR    | UC     | RFM, PE         | HOSP                                        | 12   |
| Vona, 2011 [164]               | NR          | 604  | MI                         | NR   | NR    | UC     | ET              | HOSP, CVHOSP                                | 24   |
| West, 2012 [165]               | UK          | 1813 | MI                         | 64.4 | 73.5% | PE     | PE, ET          | TM, TMI, REV, CABG, PCI, HOSP, CVHOSP       | 108  |

|                          |       |     |                    |      |       |         |             |                               |    |
|--------------------------|-------|-----|--------------------|------|-------|---------|-------------|-------------------------------|----|
| Wheeler, 2003<br>[166]   | USA   | 570 | MI, Angina         | 72.0 | NR    | UC      | PE          | TM                            | 18 |
| Wilhelmse, 1975<br>[167] | USA   | 315 | MI                 | 50.6 | 88.9% | UC      | ET          | TM, CVM,<br>TMI, FMI,<br>NFMI | 60 |
| Xavier, 2016<br>[168]    | India | 806 | MI, Angina         | 56.4 | 82.6% | UC      | RFM, PE     | TM                            | 12 |
| Yu, 2004 [169]           | China | 269 | MI, PCI,<br>Angina | 64   | 75.8% | RFM, PE | RFM, PE, ET | TM, HOSP                      | 24 |
| Zetta, 2011 [170]        | UK    | 233 | CABG, PCI          | 65.4 | 63.9% | PE      | RFM, PM, PE | REV                           | 6  |
| Zhu, 2014 [171] †        | China | 196 | MI, Angina,<br>PCI | 63.8 | 73.0% | UC      | PE, ET      | HOSP                          | 6  |

MI = myocardial infarction; CAD = Coronary arterial Disease; CABG = Coronary artery bypass grafting; PCI = Percutaneous coronary intervention; NR = not reported; NA = not applicable; USA = United States of America; UK = United Kingdom; UC = usual care; NC = Nutritional Counselling; RFM = Risk Factor Modification; PM = Psychosocial Management; PE = Patient Education; ET = Exercise Training. TM = total mortality. CVM = cardiovascular mortality. FMI = fatal myocardial infarction. NFMI = non-fatal myocardial infarction. REV = revascularization. HOSP = hospitalization. CVHOSP = cardiovascular hospitalization. † components in trials with 3 arms not shown.

**Supplemental File 3—Core Components Evaluated in Study Arms of Included Trials by Endpoint**

| Component               | Number of Arms with CR Component by Outcome |         |     |     |      |     |      |     |      |         |
|-------------------------|---------------------------------------------|---------|-----|-----|------|-----|------|-----|------|---------|
|                         | Mort                                        | CV Mort | MI  | FMI | NFMI | REV | CABG | PCI | Hosp | CV Hosp |
| UC                      | 75                                          | 24      | 34  | 9   | 21   | 29  | 18   | 12  | 30   | 15      |
| NC                      | 4                                           | 4       | 3   | 2   | 3    | 2   | 0    | 1   | 0    | 0       |
| PE                      | 26                                          | 10      | 12  | 3   | 5    | 12  | 8    | 6   | 8    | 5       |
| ET                      | 21                                          | 13      | 13  | 4   | 11   | 14  | 11   | 4   | 8    | 5       |
| PM                      | 15                                          | 3       | 7   | 2   | 4    | 5   | 2    | 2   | 7    | 4       |
| RFM                     | 7                                           | 3       | 3   | 1   | 2    | 4   | 3    | 3   | 4    | 3       |
| NC + PE                 | 2                                           | 2       | 2   | 2   | 2    | 1   | 0    | 0   | 0    | 0       |
| NC + ET                 | 1                                           | 0       | 0   | 0   | 0    | 0   | 0    | 0   | 0    | 0       |
| NC + PM                 | 1                                           | 1       | 1   | 0   | 0    | 2   | 2    | 2   | 1    | 1       |
| NC + RFM                | 2                                           | 2       | 2   | 0   | 0    | 0   | 1    | 1   | 0    | 0       |
| PE + ET                 | 8                                           | 1       | 3   | 1   | 0    | 1   | 1    | 1   | 3    | 2       |
| PE + PM                 | 9                                           | 3       | 4   | 0   | 6    | 7   | 3    | 1   | 4    | 4       |
| PE + RFM                | 12                                          | 2       | 2   | 1   | 1    | 0   | 0    | 0   | 6    | 1       |
| ET + PM                 | 3                                           | 2       | 2   | 1   | 2    | 2   | 2    | 1   | 3    | 1       |
| ET + RFM                | 3                                           | 0       | 1   | 0   | 0    | 2   | 2    | 2   | 1    | 1       |
| PM + RFM                | 3                                           | 2       | 2   | 1   | 1    | 0   | 0    | 0   | 1    | 1       |
| NC + PE + ET            | 4                                           | 2       | 2   | 1   | 0    | 2   | 1    | 0   | 1    | 1       |
| NC + PE + PM            | 0                                           | 0       | 0   | 0   | 0    | 0   | 0    | 0   | 0    | 0       |
| NC + PE + RFM           | 4                                           | 1       | 1   | 0   | 0    | 3   | 2    | 3   | 1    | 0       |
| NC + ET + PM            | 1                                           | 1       | 1   | 1   | 0    | 1   | 1    | 1   | 0    | 0       |
| NC + ET + RFM           | 1                                           | 0       | 0   | 0   | 0    | 0   | 0    | 0   | 0    | 0       |
| NC + PM + RFM           | 1                                           | 0       | 1   | 0   | 0    | 0   | 1    | 0   | 0    | 0       |
| PE + ET + PM            | 6                                           | 2       | 2   | 1   | 0    | 3   | 1    | 1   | 2    | 0       |
| PE + ET + RFM           | 4                                           | 0       | 1   | 0   | 1    | 1   | 1    | 0   | 1    | 0       |
| PE + PM + RFM           | 2                                           | 1       | 0   | 0   | 0    | 2   | 0    | 0   | 1    | 1       |
| ET + PM + RFM           | 1                                           | 0       | 0   | 0   | 0    | 0   | 0    | 0   | 1    | 1       |
| NC + PE + ET + PM       | 5                                           | 1       | 1   | 0   | 0    | 1   | 0    | 0   | 2    | 0       |
| NC + PE + ET + RFM      | 4                                           | 2       | 2   | 1   | 0    | 1   | 1    | 1   | 1    | 1       |
| NC + PE + PM + RFM      | 0                                           | 0       | 0   | 0   | 0    | 0   | 0    | 0   | 0    | 0       |
| NC + ET + PM + RFM      | 2                                           | 0       | 2   | 0   | 1    | 1   | 2    | 1   | 0    | 0       |
| PE + ET + PM + RFM      | 4                                           | 0       | 0   | 0   | 0    | 1   | 1    | 1   | 1    | 1       |
| NC + PE + ET + PM + RFM | 8                                           | 3       | 3   | 1   | 2    | 3   | 3    | 2   | 4    | 1       |
| Total                   | 239                                         | 85      | 107 | 32  | 62   | 100 | 67   | 46  | 91   | 49      |

CR = cardiac rehabilitation. NC = nutritional counseling. RFM = risk factor modification. PM = psychosocial management. PE = patient education. ET = exercise training; UC = usual care. Mort = mortality. CV = cardiovascular. MI = myocardial infarction. FMI = fatal myocardial infarction. NFMI = non-fatal myocardial infarction. Rev = revascularization. CABG = coronary artery bypass surgery. PCI = percutaneous coronary intervention. Hosp = hospitalization.

**Supplemental File 4— Graphical Display of Distribution for Each Core Component for Each Outcome (Main-Effects Model)**

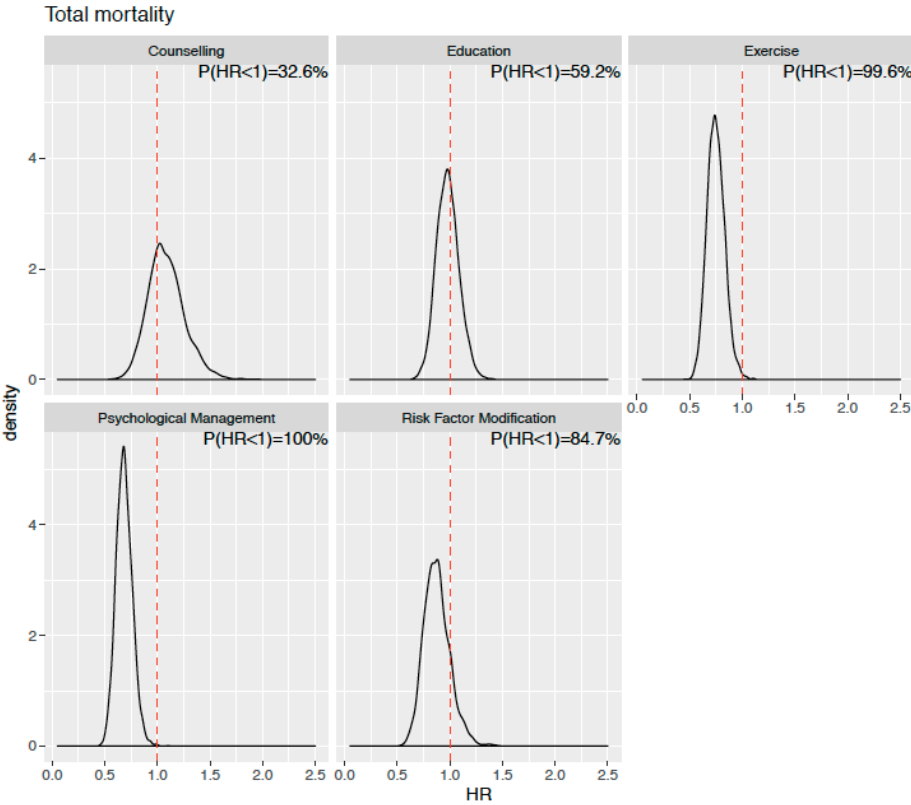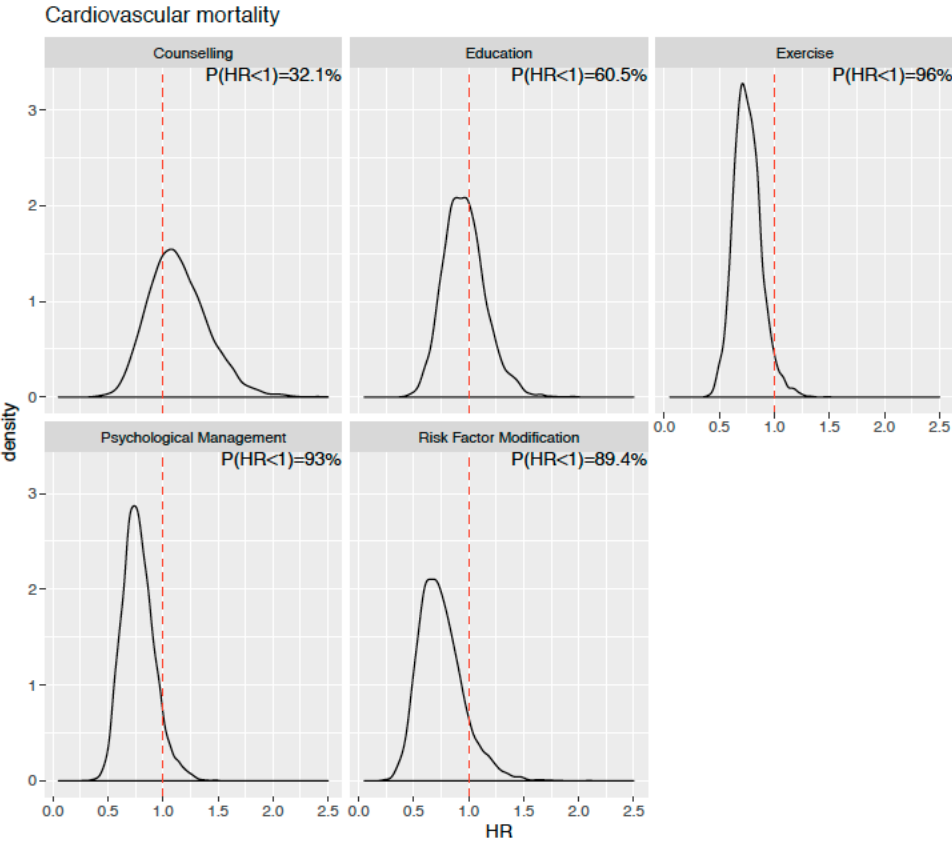

### Total MI

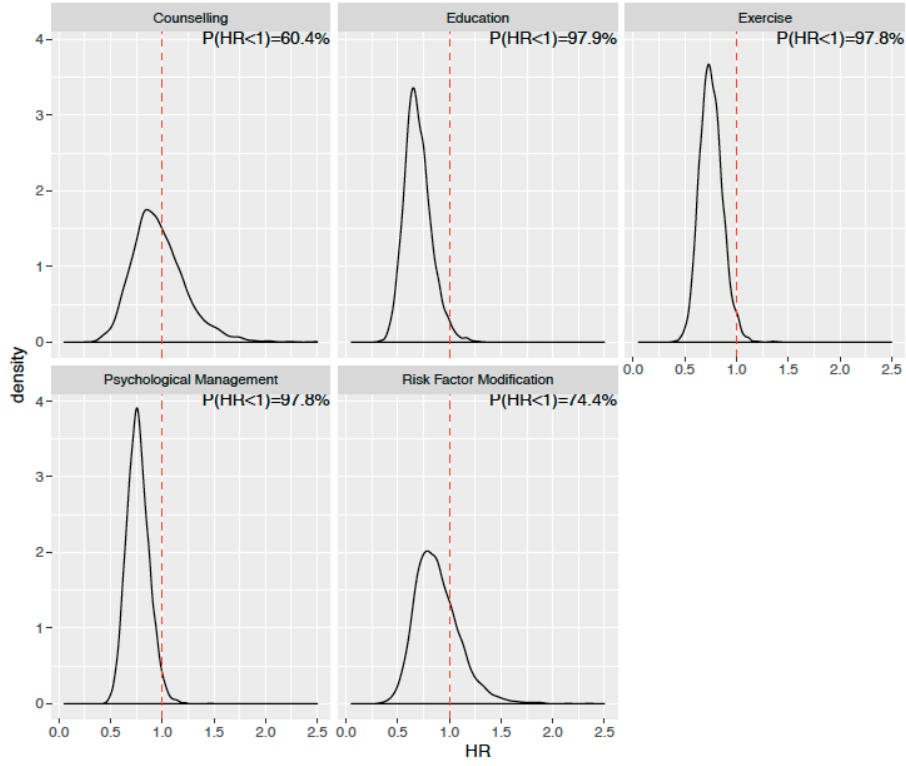

### Non-fatal MI

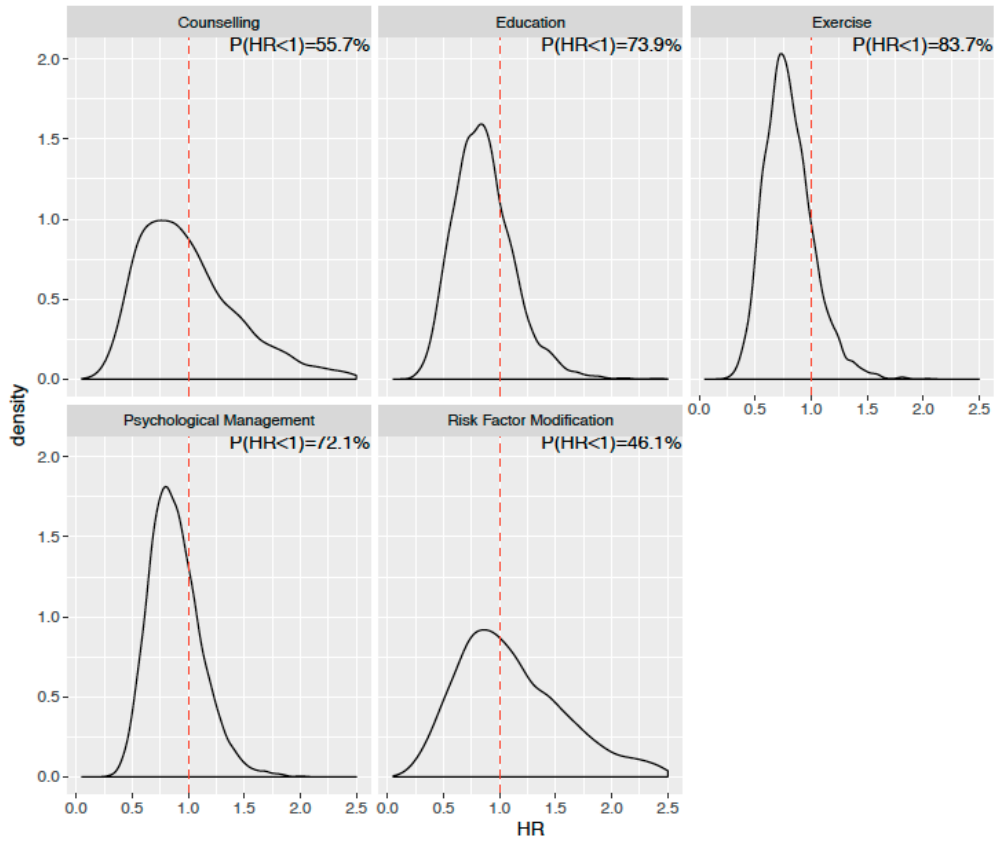

### Any hospitalization

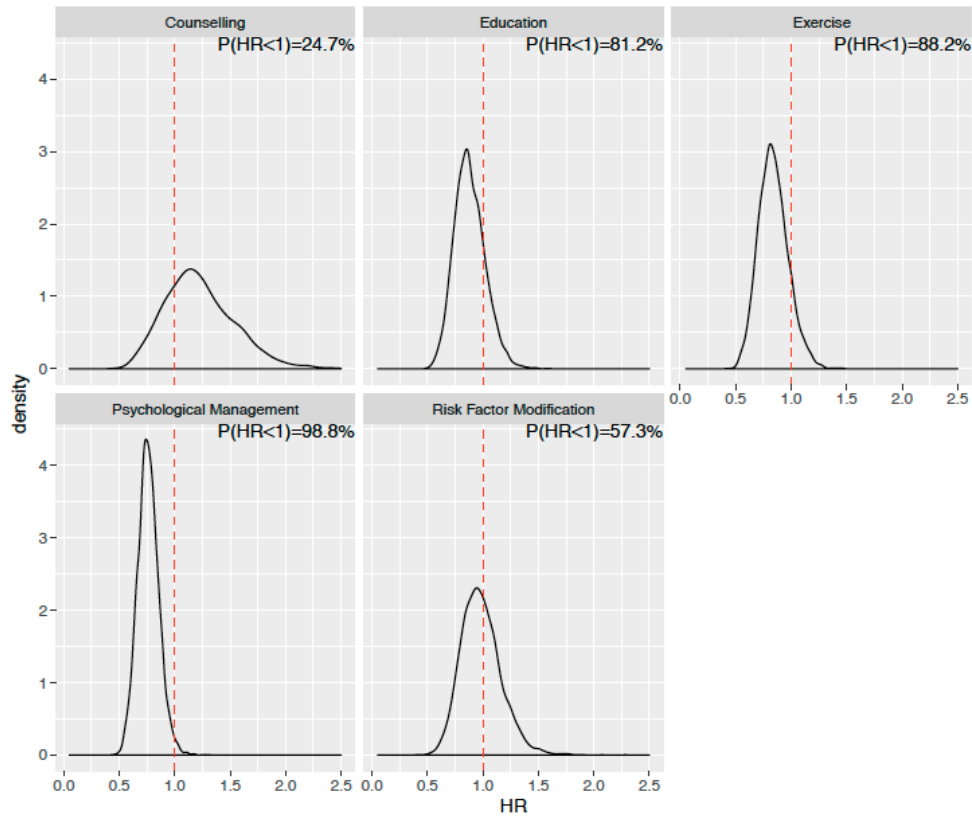

### CV hospitalization

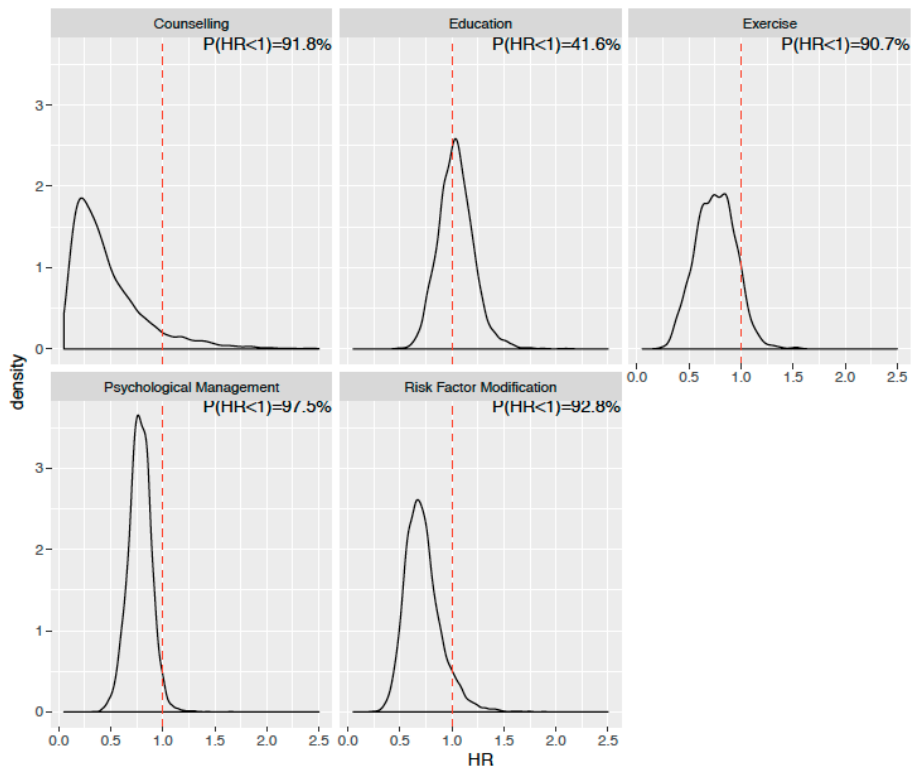

Note: counselling refers to nutrition counselling. CV, cardiovascular; MI, myocardial infarction.
